# Supplementary material for: A Sensitive and Specific Neural Signature Robustly Predicts Graded Computations of Moral Wrongness
Source: Research Square preprint supplement (doi:10.21203/rs.3.rs-7935407/v1), 2025-11-25
Supplement: Supplementary file 1 [file 1ae6abc415a3307bbd35f2c2.docx]

**A sensitive and specific neural signature robustly predicts graded computations of moral wrongness**

Frederic R. Hopp, Sungbin Youk, Walter Sinnott-Armstrong& René Weber

**Supplementary Information**

[**Supplementary Methods 2**](#_ypl6rk9z1e9r)

[Determining brain regions associated with and predictive of moral wrongness on the individual level 2](#_i00kmfldcn65)

[fMRI data preprocessing (studies 1–4, 8–10) 2](#_qpkoxeo554dt)

[Participants in intentional vs. accidental harms scenarios (study 7) 4](#_o0pss16uns9m)

[Stimuli and paradigm used in study 7 4](#_3oe7rp1arons)

[MRI data acquisition and first-level analysis for study 7 5](#_10zg9q85uld2)

[Participants in visual scenes experiment 1 (Study 8) 5](#_2pp6zigmhe0a)

[Stimuli and paradigm used in visual scenes experiment 1 5](#_cp7avng9fioy)

[MRI data acquisition for visual scenes experiment 1 5](#_qumf7np2dyve)

[fMRI data preprocessing and first-level fMRI analysis for visual scenes experiment 1 6](#_ibz3fmy5grtb)

[Participants in visual scenes experiment 2 (Study 9) 6](#_mgoddu4k8phy)

[Stimuli and paradigm used in visual scenes experiment 2 6](#_xiek1sj6tqee)

[MRI data acquisition for visual scenes experiment 2 6](#_y6sx4u1v3ku7)

[fMRI data preprocessing and first-level fMRI analysis for visual scenes experiment 2 6](#_6qg5ye7bz7yw)

[Ultimatum Game paradigm in study 10 7](#_hvgxdotrwx38)

[MRI data acquisition, preprocessing, and first level analysis in study 10 7](#_fismpa5g6f4k)

[**Supplementary Results 7**](#_hlc74uvle35t)

[MJS requires, but not fully depends on, the visual cortex 8](#_llldfjshzlke)

[Brain regions associated with and predictive of moral wrongness on the individual level 8](#_qvxa4dm1p5p)

[**Supplementary Tables 10**](#_8l41oh97ybc1)

[Supplementary Table 1. Information for each study. 10](#_h6tjgiql63w1)

[Supplementary Table 2. Correlations between MFQ and MFV responses. 11](#_rvmenbftba09)

[Supplementary Table 3. Comparing prediction (correlation) of MJS across cohorts. 11](#_77h5h6ww1kgh)

[Supplementary Table 4. Comparing predictions (classifications) of MJS, PINES, and VIDS. 12](#_txp133qky30a)

[Supplementary Table 5. Correlations between MJS response and averaged vignette ratings. 13](#_e04x7e311b5b)

[Supplementary Table 6. Average pattern expressions of cross-decoding models. 14](#_95wo2nnglug5)

[Supplementary Table 7. Performance comparison of cross-decoding models. 15](#_mzwo9x9as810)

[Supplementary Table 8. Comparing prediction (correlation) of MJS, PINES, and VIDS 16](#_32r6jhw9x0l2)

[**Supplementary References 16**](#_pidwgvivxu2z)

# Supplementary Methods

## **Determining brain regions associated with and predictive of moral wrongness on the individual level**

We examined regions involved in the graded computation of moral wrongness on the individual level by employing convergent univariate and multivariate approaches. We initially determined regions that were predominately associated with moral wrongness ratings by means of a one-sample *t* test on the first-level univariate parametric modulation beta maps. Next, to localize brain regions that were predictive of and associated with moral wrongness ratings separately as well as brain regions showing shared contributions, multivariate analyses were employed. Briefly, we evaluated the consistency of each weight for every voxel in the brain across within-subject multivariate classifiers (developed on single-trial data) using a one-sample *t* test. The thresholded map (*q*<0.05, FDR corrected for multiple comparisons) revealed consistent moral wrongness-predictive brain regions across subjects. Specifically, we performed a prediction analysis (linear SVR with C=1) for each subject in the discovery cohort separately using their single-trial data (10-fold cross-validated). Moreover, we transformed the within-subject patterns into ‘activation patterns’ to identify significant brain regions exhibiting consistent moral wrongness-related effects (thresholded at *q*<0.05, FDR corrected).

##

## **fMRI data preprocessing (studies 1–4, 8–10)**

MRI data for studies 1–4 and 8–10 were preprocessed by using *fMRIPrep* 24.1.1 (Esteban et al. (2019); Esteban et al. (2018); RRID:SCR_016216), which is based on *Nipype* 1.8.6 (K. Gorgolewski et al. (2011); K. J. Gorgolewski et al. (2018); RRID:SCR_002502).

**Anatomical data preprocessing**

Each T1w image was corrected for intensity non-uniformity (INU) with N4BiasFieldCorrection (Tustison et al. 2010), distributed with ANTs 2.5.3 (Avants et al. 2008, RRID:SCR_004757), and used as T1w-reference throughout the workflow. The T1w-reference was then skull-stripped with a *Nipype* implementation of the antsBrainExtraction.sh workflow (from ANTs), using OASIS30ANTs as target template. Brain tissue segmentation of cerebrospinal fluid (CSF), white-matter (WM) and gray-matter (GM) was performed on the brain-extracted T1w using fast (FSL (version unknown), RRID:SCR_002823, Zhang, Brady, and Smith 2001). Brain surfaces were reconstructed using recon-all (FreeSurfer 7.3.2, RRID:SCR_001847, Dale, Fischl, and Sereno 1999), and the brain mask estimated previously was refined with a custom variation of the method to reconcile ANTs-derived and FreeSurfer-derived segmentations of the cortical gray-matter of Mindboggle (RRID:SCR_002438, Klein et al. 2017). A T2-weighted image was used to improve pial surface refinement. Brain surfaces were reconstructed using recon-all (FreeSurfer 7.3.2, RRID:SCR_001847, Dale, Fischl, and Sereno 1999), and the brain mask estimated previously was refined with a custom variation of the method to reconcile ANTs-derived and FreeSurfer-derived segmentations of the cortical gray-matter of Mindboggle (RRID:SCR_002438, Klein et al. 2017). Volume-based spatial normalization to one standard space (MNI152NLin2009cAsym) was performed through nonlinear registration with antsRegistration (ANTs 2.5.3), using brain-extracted versions of both T1w reference and the T1w template. The following template was were selected for spatial normalization and accessed with *TemplateFlow* (24.2.0, Ciric et al. 2022): *ICBM 152 Nonlinear Asymmetrical template version 2009c* [Fonov et al. (2009), RRID:SCR_008796; TemplateFlow ID: MNI152NLin2009cAsym].

**Functional data preprocessing**

For each of the BOLD runs found per subject (across all tasks and sessions), the following preprocessing was performed. First, a reference volume was generated, using a custom methodology of *fMRIPrep*, for use in head motion correction. Head-motion parameters with respect to the BOLD reference (transformation matrices, and six corresponding rotation and translation parameters) are estimated before any spatiotemporal filtering using mcflirt (FSL , Jenkinson et al. 2002). The BOLD reference was then co-registered to the T1w reference using bbregister (FreeSurfer) which implements boundary-based registration (Greve and Fischl 2009). Co-registration was configured with six degrees of freedom. The aligned T2w image was used for initial co-registration.Several confounding time-series were calculated based on the *preprocessed BOLD*: framewise displacement (FD), DVARS and three region-wise global signals. FD was computed using two formulations following Power (absolute sum of relative motions, Power et al. (2014)) and Jenkinson (relative root mean square displacement between affines, Jenkinson et al. (2002)). FD and DVARS are calculated for each functional run, both using their implementations in *Nipype* (following the definitions by Power et al. 2014). The three global signals are extracted within the CSF, the WM, and the whole-brain masks. Additionally, a set of physiological regressors were extracted to allow for component-based noise correction (*CompCor*, Behzadi et al. 2007). Principal components are estimated after high-pass filtering the *preprocessed BOLD* time-series (using a discrete cosine filter with 128s cut-off) for the two *CompCor* variants: temporal (tCompCor) and anatomical (aCompCor). tCompCor components are then calculated from the top 2% variable voxels within the brain mask. For aCompCor, three probabilistic masks (CSF, WM and combined CSF+WM) are generated in anatomical space. The implementation differs from that of Behzadi et al. in that instead of eroding the masks by 2 pixels on BOLD space, a mask of pixels that likely contain a volume fraction of GM is subtracted from the aCompCor masks. This mask is obtained by dilating a GM mask extracted from the FreeSurfer’s *aseg* segmentation, and it ensures components are not extracted from voxels containing a minimal fraction of GM. Finally, these masks are resampled into BOLD space and binarized by thresholding at 0.99 (as in the original implementation). Components are also calculated separately within the WM and CSF masks. For each CompCor decomposition, the *k* components with the largest singular values are retained, such that the retained components’ time series are sufficient to explain 50 percent of variance across the nuisance mask (CSF, WM, combined, or temporal). The remaining components are dropped from consideration. The head-motion estimates calculated in the correction step were also placed within the corresponding confounds file. The confound time series derived from head motion estimates and global signals were expanded with the inclusion of temporal derivatives and quadratic terms for each (Satterthwaite et al. 2013). Frames that exceeded a threshold of 0.5 mm FD or 1.5 standardized DVARS were annotated as motion outliers. Additional nuisance timeseries are calculated by means of principal components analysis of the signal found within a thin band (*crown*) of voxels around the edge of the brain, as proposed by (Patriat, Reynolds, and Birn 2017). All resamplings can be performed with *a single interpolation step* by composing all the pertinent transformations (i.e. head-motion transform matrices, susceptibility distortion correction when available, and co-registrations to anatomical and output spaces). Gridded (volumetric) resamplings were performed using nitransforms, configured with cubic B-spline interpolation.

## **Participants in intentional vs. accidental harms scenarios (study 7)**

The study 7 dataset included in the present paper is from a series of previously published studies (Chakroff et al., 2016; Koster-Hale et al., 2013, Tsoi et al., 2018; Wasserman et al., 2017). Two groups of people participated in the study: one group of neurotypical adults (NT) and one group of adults with autism spectrum disorder (ASD). The NT group consisted of 25 adults from the Boston area between the ages of 19 and 50 (17 males; mean ± s.d. age 28.64 ± 9.72 years). The ASD group consisted of 14 adults between the ages of 21 and 46 (12 males; mean ± s.d. age 33.35 ± 7.83 years). Detailed information for the recruitment and diagnosis of ASD participants is reported in Tsoi et al. (2018). All participants were right-handed native English speakers with normal or corrected-to-normal vision.

## **Stimuli and paradigm used in study 7**

Participants were scanned while reading 60 vignettes in the second-person point of view (i.e. “You buy spinach for your grandmother. You use it to make her a large salad”; see Supplementary Material in Tsoi et al., 2018, for a full list of vignettes). Twenty-four vignettes involved intentional and accidental harm violations. Of these 24 vignettes, 12 scenarios involved physical harm (e.g. giving someone food poisoning) and 12 involved psychological harm (e.g. exposing someone to their object of phobia). Twelve vignettes involved neutral acts (e.g. stepping into a puddle). The remaining vignettes involved different types of purity violations (e.g. smearing feces on one’s own face [pathogen] vs. having sex with a sibling [incest]). Each scenario contained five segments: background (6s), action (4s), outcome (4s), intent (4s) and judgment (4s). During the judgment segment, participants made moral judgments of the action (i.e. “Judge how morally wrong your behavior was”) on a scale from 1 (not at all) to 4 (very) using a response box. The scale was always presented with 1 on the left of the screen and 4 on the right of the screen. Ten scenarios were presented in each 5.5-min run; there were a total of six runs, which lasted 33.2 min. Scenarios were presented in a pseudorandom order, with the order of conditions counterbalanced across runs and across participants.

## **MRI data acquisition and first-level analysis for study 7**

The fMRI data were collected using a 12-channel head coil in a 3T Siemens scanner at the Athinoula A. Martinos Imaging Center at the McGovern Institute for Brain Research at the Massachusetts Institute of Technology. Data were acquired in 26 3x3x4 mm near-axial slices using standard echoplanar imaging procedures (TR (repetition time) = 2s, TE (echo time) = 40 ms, flip angle = 90°). The first 4s of each run were excluded to allow for steady state magnetization. Data were preprocessed using [fMRIprep](#_qpkoxeo554dt). Preprocessed images were spatially smoothed using a Gaussian filter (full-width half-maximum, 8 mm kernel). Next, we conducted

subject-level GLM analyses in which the six runs were modeled by separate regressors in the same GLM. To account for residual variance, the temporal derivative of each condition regressor was added as well as a constant regressor for each entire run. The GLM model was used to obtain beta images for the prediction analysis. In this model, an event was defined as the intention phase of each vignette condition (4s) for all 10 conditions: 2 (intent: intentional vs. accidental) x 5 (content: psychological harm, physical harm, pathogen, incest, neutral). All task regressors were convolved with the canonical haemodynamic response function and a standard high-pass filter (90s cutoff) was applied to exclude low-frequency drifts. Regressors of non-interest (nuisance variables) included (1) six head movement parameters and their squares, their derivatives and squared derivatives (leading to 24 motion-related nuisance regressors in total) and (2) vectors indicating motion outlier timepoints.

## **Participants in visual scenes experiment 1 (Study 8)**

The first visual scene task included the same enrollment criteria and participants recruited during study 2. Data from 1 participant was excluded due issues with stimulus presentation during fMRI scanning, leading to a final sample of n=30 participants (19 females; mean±SD age=20.22±1.98 years).

## **Stimuli and paradigm used in visual scenes experiment 1**

The visual scene task in study 8 included 78 pictures, all of which were representatively sampled (see Hopp et al., 2024) from the Socio-Moral Image Database (SMID; Crone et al., 2018), distributed over 3 runs (with 26 stimuli per run). Stimuli were presented using PsychoPy (version 2022.1.2., Peirce, 2007). Participants were instructed to pay attention to the pictures and evaluate whether the image displays something moral or immoral. Each trial started with a 2s fixation-cross, followed by a 7s presentation of the picture, followed by a 4s rating period. During the rating period, participants reported how moral or immoral they experienced the stimuli using a 5-point bipolar Likert scale with 1 indicating very moral, 2 indicating somewhat moral, 3 indicating neutral, 4 somewhat immoral, and 5 indicating very immoral. All participants reported ‘1-4’ in their responses while 1 out of 30 participants did not report the rating ‘5’.

## **MRI data acquisition for visual scenes experiment 1**

MRI data acquisition was identical to study 2.

## **fMRI data preprocessing and first-level fMRI analysis for visual scenes experiment 1**

Preprocessing was identical to study 2. Subject-level GLMs were implemented by adapting the design of related picture-rating studies for evaluating neural biomarkers (Chang et al., 2015; Gan et al., 2024; Zhou et al., 2022). Specifically, the GLM model used to create beta images for the prediction analyses included five separate regressors time-logged to the presentations of pictures for each rating (that is, 1–5), enabling us to model brain activity in response to each moral judgment level separately. The model also included one boxcar regressor indicating the 4-s rating period aiming to model effects correlated with motor activity. The fixation-cross epoch was used as an implicit baseline. Task regressors were convolved with the canonical haemodynamic response function and their temporal derivatives and a high-pass filter of 90s was applied. The three runs of the fMRI task were concatenated for each participant (via nltools Brain_Data.append() function). Nuisance variables encompassed: (1) ‘dummy’ regressors representing each run (intercept for each run); (2) the six estimated head movement parameters (X, Y, Z, roll, yaw and pitch), their squares, their derivatives and squared derivatives for each run (24 columns in total); (3) vectors indicating motion outlier timepoints.

##

## **Participants in visual scenes experiment 2 (Study 9)**

The second visual scene task included the same enrollment criteria and participants recruited during study 4. No data was excluded from analysis.

## **Stimuli and paradigm used in visual scenes experiment 2**

The visual scene task in study 9 included 120 pictures, with 59 images overlapping with study 8, all of which were representatively sampled (see Hopp et al., 2024) from the Socio-Moral Image Database (SMID; Crone et al., 2018), distributed over 3 runs (with 40 stimuli per run). Stimuli were presented using PsychoPy (version 2022.1.2., Peirce, 2007). Participants were instructed to pay attention to the pictures and evaluate whether the image displays something moral or immoral. Each trial started with a 2s fixation-cross, followed by a 7s presentation of the picture, followed by a 4s rating period. During the rating period, participants reported how moral or immoral they experienced the stimuli using a 5-point bipolar Likert scale with 1 indicating very moral, 2 indicating somewhat moral, 3 indicating neutral, 4 somewhat immoral, and 5 indicating very immoral. All participants reported ‘1-4’ in their responses while 2 out of 30 participants did not report the rating ‘5’ and 1 out of 30 participants did not report the rating ‘1’.

## **MRI data acquisition for visual scenes experiment 2**

MRI data acquisition was identical to study 4.

## **fMRI data preprocessing and first-level fMRI analysis for visual scenes experiment 2**

Preprocessing was identical to study 4 and the GLM analysis was identical to study 8.

#

## **Ultimatum Game paradigm in study 10**

The study 10 dataset included in the present paper has been described in Gan et al., 2024. Briefly, participants completed a modified version of the Ultimatum Game (UG) paradigm (Xu et al., 2025) with concomitant fMRI. During the UG participants were in the role of the responder who received a series of offers from the proposer. In line with the standard version of the UG, the paradigm included 20 trials with offers of distributions of a fixed sum (100RMB per trial). The unfairness of the offer followed a randomized but uniform distribution such that each participant would be presented with the full range of offers ranging from fair (50RMB versus 50RMB) to very unfair (97.5RMB versus 2.5RMB). Participants were informed that if they accepted the monetary offer, the money would be divided between them and the proposer according to the offer, however, if they rejected the offer, neither side would receive any money. The modified version included additional trial-wise ratings regarding: (1) the amount of money (within a range of 2.5RMB to 50RMB, 20 offers) they would expect; (2) the prediction of the emotional experience of the anticipated offer, and (3) report of the actual emotional experience in response to the offer. In the context of the current study, we focused on the classic part of the UG during which the participant was presented with an offer by the proposer and decided whether to accept or reject the offer (Xu et al., 2025). Results of the modification (behavioral and neural activity related to the expectation and outcome) were part of an independent study (not presented here). Each task trial began with a fixation cross presented for a jittered interval of 2s followed by the presentation of expected offers and ratings, actual offer presentation, and decision periods (mean duration for each task trial=14s). In line with Chapman et al. (2009), we focused on the first 20 trials of the monetary distribution offers (Xu et al., 2025) and further categorized them into 5 levels of unfairness (i.e., unfairness level 1 to 5, see Supplementary Table 5 in Gan et al., 2024, for details).

#

## **MRI data acquisition, preprocessing, and first level analysis in study 10**

Imaging data acquisition was identical to the discovery and validation cohorts. All fMRI images were preprocessed and analyzed using standard procedures in SPM12 (Statistical Parametric Mapping; http://www.fil.ion.ucl.ac.uk/spm/; Welcome Trust Centre for Neuroimaging). The first 5 volumes of each functional time series were discarded to allow for T1 equilibration. Remaining images were corrected for acquisition time delay, realigned to correct for head motion, unwarped for magnetic field inhomogeneities correction, and co-registered with the T1-weighted structural image. After that the images were normalized to Montreal Neurological Institute (MNI) standard space (interpolated to 2×2×2mm voxel size) using the segmentation parameters from the anatomical images, and were then spatially smoothed using an isotropic Gaussian kernel with fullwidth at half-maximum (FWHM) of 8mm. The 20 pairs of offers were divided into 5 levels of unfairness, and included as separate regressors in the GLM model with the onsets time-logged to the actual presentation of the offer. The six head motion parameters were included as covariates of no interest.

# Supplementary Results

## **MJS requires, but not fully depends on, the visual cortex**

To examine to which extent the performance of MJS may depend on the contribution of the visual cortex – which might encode emotional experience or aspects of high-level visual processing related to (moral) emotion (Kragel et al., 2019) – the moral wrongness decoder was re-trained excluding the entire occipital lobe (Lancester et al., 2000). Results showed that the overall prediction-outcome correlations (the discovery cohort, cross-validation  *r*=0.71, 95% CI=[0.65, 0.76]; the validation cohort, *r*=0.54, 95% CI=[0.42, 0.65]; the replication cohort, *r*=0.51, 95% CI=[0.37, 0.64]; the generalization cohort, *r*=0.39, 95% CI=[0.23, 0.52]), within-subject correlation between predicted and true moral wrongness ratings (the discovery cohort, *r*=0.91±0.03; the validation cohort, *r*=0.86±0.03; the replication cohort, *r*=0.83±0.07; the generalization cohort, *r*=0.91±0.02) and classification accuracies were largely maintained (see Extended Data Fig. 3 for details). This indicates that moral wrongness-predictive neural representations are partly embedded in the visual cortex but the contribution of visual cortical patterns is comparably small.

## **Brain regions associated with and predictive of moral wrongness on the individual level**

To identify regions involved in the graded computation of moral wrongness on the individual level, convergent univariate and multivariate approaches were employed. First, we performed a one-sample *t* test on the first-level parametric modulation beta maps to determine brain regions that increased activity in association with the subjective rating of moral wrongness (i.e., the higher the ratings the higher functional activation in the respective brain regions). Results revealed that moral wrongness was correlated with activation in a broad network spanning multiple cortical and subcortical systems, including dorsomedial and ventromedial prefrontal cortex (PFC), posterior cingulate cortex (PCC), left temporoparietal junction (TPJ), as well as caudate, thalamus, and hippocampus. Conversely, we found negative correlations with moral wrongness ratings in the right orbitofrontal cortex (OFC), the right posterior insula, and the putamen (*q* < 0.05, FDR corrected; Fig. 4b).

Next, we validated and extended the univariate results by multivariate models in several ways. We first performed a one-sample *t* test (treating participant as a random effect) on the weights obtained from within-subject multivariate predictive models (for details, see ‘Supplementary Methods’). Similar to the univariate maps, within-subject predictive models (backward models) included consistent weights in brain regions spanning multiple large-scale cortical and subcortical systems that largely overlapped with the wrongness regions as determined by the univariate parametric modulation approach (Fig. 4c; *q*<0.05, FDR corrected).

To provide a more direct comparison between univariate and multivariate results, we further calculated within-subject reconstructed ‘activation patterns’ (or ‘structure coefficients’), which map each voxel to the overall multivariate model prediction (Haufe et al., 2014). Fig. 4d shows the thresholded transformed ‘activation patterns’ from the within-subject moral wrongness-predictive patterns. As shown in Fig. 4d, the thresholded ‘model activation patterns’ display an overlap with the univariate and multivariate patterns (Fig. 4b,c), confirming that the graded computation of moral wrongness is encoded in a distributed neural representation encompassing cortical and subcortical regions. The overlap of the multivariate predictive models (i.e., conjunction between within-subject model weights and model encoding maps; Fig. 4e) revealed that most significant model weights in the multivariate models also encoded model information (i.e., showed significant ‘model activation patterns’). The broad conclusion is that the graded computation of moral wrongness is not limited to a single or a set of focal regions (e.g., the dmPFC), but rather encoded in a broad set of regions spanning cortical and subcortical systems.

#

# Supplementary Tables

## Supplementary Table 1. Information for each study.

| *Study* | *Dataset ref.* | *Stimuli Types* | *N* (female) | *Mean age (SD)* | *Study location* | *MRI system* |
| --- | --- | --- | --- | --- | --- | --- |
| 1 | Discovery | Moral vignettes | 64  (31) | 20.78 (2.45) | UCSB | 3T Siemens Prisma |
| 2 | Validationa | Moral vignettes | 30  (19) | 20.51 (2.35) | UCSB | 3T Siemens Prisma |
| 3 | Replication | Moral vignettes | 27  (13) | 24.65 (4.21) | Duke | 3T GE |
| 4 | Generalizationa | Moral vignettes | 30  (18) | 26.4 (9.17) | University of Amsterdam | 3T Philips Achiva |
| 5 | Chang et al.,  2015 | Negative and neutral pictures | 61 (Not reported) | Not  reported | University of Colorado, Boulder | 3T Siemens Trio |
| 6 | Gan et al.,  2024 | Pictures with varying disgust intensity levels | 30  (16) | 21.13 (2.18) | UESTC | 3T GE |
| 7 | Koster-Hale et al., 2013 | Moral scenarios | 39  (10) | 30.33 (9.26) | MIT | 3T Siemens Trio |
| 8 | Visual scenes data 1a | Moral and immoral pictures | 30  (19) | 20.51 (2.35) | UCSB | 3T Siemens Prisma |
| 9 | Visual scenes data 2a | Moral and immoral pictures | 30  (18) | 26.4 (9.17) | University of Amsterdam | 3T Philips Achiva |
| 10 | Ultimatum  game datab | A series of unfairness offers | 43  (23) | 21.26 (2.12) | UESTC | 3T GE |
| a current study data; b unpublished data | | | | | | |

##

## Supplementary Table 2. Correlations between MFQ and MFV responses.

| **MFQ** | **MFV** | | | | | | |
| --- | --- | --- | --- | --- | --- | --- | --- |
| Care physical | Care emotional | Fairness | Liberty | Loyalty | Authority | Sanctity |
| Care | **0.47** | **0.31** | 0.31 | 0.40 | 0.16 | 0.09 | 0.14 |
| Fairness | 0.47 | 0.41 | **0.37** | 0.48 | 0.10 | 0.17 | 0.13 |
| Loyalty | -0.17 | 0.12 | 0.15 | -0.08 | **0.40** | 0.46 | 0.26 |
| Authority | -0.19 | 0.02 | 0.08 | -0.23 | 0.28 | **0.42** | 0.45 |
| Sanctity | -0.12 | 0.14 | 0.16 | -0.12 | 0.34 | 0.47 | **0.35** |

Pearson correlation coefficients between average Moral Foundations Questionnaire (MFQ; Graham et al., 2013) responses and average moral wrongness ratings for Moral Foundations Vignettes (MFV) in the discovery cohort. Bold values highlight domain-matched associations.

## Supplementary Table 3. Comparing prediction (correlation) of MJS across cohorts.

| *Cohort* | *Overall Prediction-Outcome Correlation* | *Within-Subject Prediction-Outcome Correlation* | *Average RMSE* |
| --- | --- | --- | --- |
| Discovery | 0.78 | 0.94 ± 0.02 | 0.68 ± 0.05 |
| Validation | 0.60 | 0.80 ± 0.05 | 0.98 ± 0.09 |
| Replication | 0.49 | 0.82 ± 0.07 | 1.10 ± 0.07 |
| Generalization | 0.42 | 0.91 ± 0.02 | 1.03 ± 0.07 |

##

##

##

##

## Supplementary Table 4. Comparing predictions (classifications) of MJS, PINES, and VIDS.

| **Classifications** |  | **MJS** | **PINES** | **VIDS** |
| --- | --- | --- | --- | --- |
| Discovery | 1 < 2  2 < 3  3 < 4  1 < 3  2 < 4  1 < 4 | 91 ± 4%*** (0.93)  100 ± 0%*** (1.48)  97 ± 2%*** (0.98)  98 ± 2%*** (2.32)  98 ± 2%*** (2.26)  98 ± 2%*** (2.99) | 81 ± 5%*** (0.49)  78 ± 5%*** (0.42)  81 ± 5%*** (0.49)  81 ± 5%*** (0.49)  86 ± 4%*** (0.88)  95 ± 3%*** (1.37) | 50 ± 6%ns (–0.11)  53 ± 6%ns (0.09)  73 ± 6%*** (0.42)  52 ± 6%ns (–0.01)  72 ± 6%*** (0.49)  70 ± 6%*** (0.43) |
| Validation | 1 < 2  2 < 3  3 < 4  1 < 3  2 < 4  1 < 4 | 59 ± 9%ns (0.38)  97 ± 3%*** (1.06)  83 ± 7%*** (0.41)  86 ± 7%*** (1.46)  100 ± 0%*** (1.47)  90 ± 6%*** (1.90) | 69 ± 9%* (0.35)  50 ± 9%ns (0.03)  57 ± 9%ns (0.10)  76 ± 8%** (0.39)  60 ± 9%ns (0.10)  83 ± 9%*** (0.14) | 34 ± 9%ns (­–0.09)  47 ± 9%ns (–0.06)  87 ± 6%*** (0.33)  38 ± 9%ns (–0.13)  80 ± 7%*** (0.25)  72 ± 8%* (0.18) |
| Replication | 1 < 2  2 < 3  3 < 4  1 < 3  2 < 4  1 < 4 | 74 ± 9%** (0.36)  96 ± 4%*** (0.71)  81 ± 8%** (0.33)  96 ± 4%*** (1.07)  96 ± 4%*** (1.06)  93 ± 5%*** (1.42) | 70 ± 9%* (0.30)  78 ± 8%** (0.25)  59 ± 10%ns (0.36)  81 ± 8%*** (0.52)  78 ± 8%** (0.61)  81 ± 8%*** (0.52) | 56 ± 10%ns (0.07)  44 ± 10%ns (–0.07)  81 ± 8%** (0.39)  56 ± 10%ns (–0.01)  78 ± 8%** (0.39)  78 ± 8%** (0.38) |
| Generalization | 1 < 2  2 < 3  3 < 4  1 < 3  2 < 4  1 < 4 | 80 ± 7%*** (0.32)  97 ± 3%*** (0.51)  77 ± 8%*** (0.36)  97 ± 3%*** (0.82)  97 ± 3%*** (0.87)  100 ± 0%*** (1.17) | 70 ± 9%* (0.22)  63 ± 9%ns (0.20)  63 ± 9%ns (0.17)  93 ± 5%*** (0.43)  83 ± 7%*** (0.36)  93 ± 5%*** (0.58) | 40 ± 9%ns (–0.22)  53 ± 9%ns (–0.02)  80 ± 7%** (0.54)  40 ± 9%ns (–0.21)  73 ± 8%** (0.60)  70 ± 9%* (0.35) |

For each dataset we used MJS, PINES, and VIDS to classify subjective moral wrongness ratings (1–4) using two-alternative forced-choice tests. Performance was shown as accuracy ± SE (Cohen’s d). *** *p* < 0.001 ** *p* < .01; * *p* < .05, and NS denotes non-significant (all uncorrected) based on one-sided binomial tests. PINES picture induced negative affect signature, VIDS visually induced disgust signature.

## Supplementary Table 5. Correlations between MJS response and averaged vignette ratings.

|  | **Discovery**  Pearson’s *r* (*P*) | **Replication**  Pearson’s *r* (*P*) | **Validation**  Pearson’s *r* (*P*) | **Generalization**  Pearson’s *r* (*P*) |
| --- | --- | --- | --- | --- |
| **Condition** |  |  |  |  |
| Physical Care | **0.62 (.013)** | –.27 (.72) | .25 (.35) | .21 (.44) |
| Emotional Care | **0.8 (< .001)** | –.18 (.88) | .23 (.39) | .25 (.37) |
| Fairness | **0.8 (< .001)** | **.88 (.008)** | .28 (.31) | .04 (.90) |
| Liberty | **0.75 (.001)** | N/A | .28 (.31) | .13 (.63) |
| Loyalty | 0.01 (.96) | .69 (.08) | –.37 (.17) | .34 (.21) |
| Authority | 0.25 (.37) | .58 (.16) | –.16 (.56) | –.25 (.36) |
| Sanctity | **0.71 (.002)** | **.95 (<.001)** | **.79 (<.001)** | **.51 (.04)** |
| Familya |  | –.08 (.89) |  |  |
| Reciprocitya |  | **.93 (.02)** |  |  |
| Propertya |  | .19 (.75) |  |  |
| Heroisma |  | .**89 (.04)** |  |  |
| Groupa |  | .47 (.42) |  |  |
| Deferencea |  | .65 (.23) |  |  |
| Social Norms | 0.26 (.35) | –.26 (.57) | .14 (.62) | –.24 (.38) |
| All | **.88 (< .001)** | **.83 (< .001)** | **.55 (<.001)** | **.6 (< .001)** |
| Moral Only | **.74 (< .001)** | **.72 (<.001)** | **.45 (<.001)** | **.47 (< .001)** |

For each dataset, we correlated the averaged MJS response to each vignette item (using subject-level trial-wise beta maps; cross-validated via leave-one-subject-out on the discovery cohort) with the averaged vignette moral wrongness rating. a connotate new vignettes (n=30) from moral domains that were not used for training the MJS. Bold values indicate significant predictions.

##

## Supplementary Table 6. Average pattern expressions of cross-decoding models.

| **Condition** | **Moral Wrongness Model** | | | | | | | |
| --- | --- | --- | --- | --- | --- | --- | --- | --- |
| Physical Care | Emotional Care | Fairness | Liberty | Loyalty | Authority | Sanctity | Social Norms |
| Physical Care | **0.43** | -0.16******* | -0.20******* | -0.34******* | -0.51******* | -0.15******* | 0.09******* | -0.03******* |
| Emotional Care | 0.24******* | **0.63** | 0.17******* | 0.26******* | -0.00******* | 0.23******* | 0.22******* | 0.10******* |
| Fairness | -0.16******* | -0.15******* | **0.24** | 0.09* | -0.06******* | -0.15******* | -0.27******* | -0.18******* |
| Liberty | -0.01******* | 0.25******* | 0.41 | **0.45** | 0.34* | 0.16******* | -0.02******* | -0.06******* |
| Loyalty | -0.08******* | 0.05******* | 0.26******* | 0.42******* | **0.79** | 0.34******* | 0.11******* | -0.15******* |
| Authority | -0.00* | 0.06 | -0.14******* | -0.04******* | 0.09 | **0.14** | -0.20******* | -0.25******* |
| Sanctity | 0.57******* | 0.22******* | 0.08******* | 0.04******* | 0.03******* | 0.07******* | **0.84** | 0.36******* |
| Social Norms | -0.22******* | -0.26******* | -0.21******* | -0.28******* | -0.32******* | -0.28******* | -0.19******* | **0.13** |

Performance was computed by a series of t-tests comparing the average model prediction on matched target domain versus each off-target domain (e.g., average model prediction from physical care model for physical care condition versus average model prediction from physical care model for each other vignette condition) . Significance values (*** *p* < .001; ** *p* < .01; * *p* < .05) across rows reflect results from Bonferoni-corrected pairwise comparisons.

## Supplementary Table 7. Performance comparison of cross-decoding models.

| **Condition** | **Moral Wrongness Model** | | | | | | | | |
| --- | --- | --- | --- | --- | --- | --- | --- | --- | --- |
| Common | Physical Care | Emotional Care | Fairness | Liberty | Loyalty | Authority | Sanctity | Social Norms |
| Physical Care | 0.77** | **0.36**** | 0.16 | 0.39** | 0.29** | 0.06 | -0.06 | 0.22* | -0.04 |
| Emotional Care | 0.81** | 0.52** | **0.17** | 0.38** | 0.39** | 0.13 | -0.06 | 0.43** | -0.34*** |
| Fairness | 0.90* | 0.50** | 0.21* | **0.62**** | 0.49** | 0.17 | -0.04 | 0.26** | -0.48*** |
| Liberty | 0.90* | 0.46** | 0.48** | 0.47** | **0.41**** | -0.32*** | -0.28** | 0.29** | -0.28** |
| Loyalty | 0.77** | 0.24* | 0.23* | 0.08 | 0.23* | **0.18** | 0.21* | 0.27* | -0.42*** |
| Authority | 0.85** | 0.22* | 0.26* | 0.27* | 0.34** | 0.09 | **-0.03** | 0.25* | -0.30** |
| Sanctity | 0.77** | 0.57** | 0.10 | 0.21* | 0.20* | 0.11 | -0.00 | **0.43**** | -0.21* |
| Social Norms | 0.20 | -0.05 | 0.55** | -0.09 | 0.22 | 0.09 | 0.31 | 0.12 | **0.03** |

Performance was computed as mean within-subject Pearson correlations. Bold values denote domain-specific moral wrongness models matched to their respective target condition. *** *p* < .001; ** *p* < .01; * *p* < .05

#

#

## Supplementary Table 8. Comparing prediction (correlation) of MJS, PINES, and VIDS

| **Datasets** | **MJS** | **PINES** | **VIDS** |
| --- | --- | --- | --- |
| Discovery | 0.78 [0.74, 0.82]; 0.94±0.02a | 0.46 [0.36, 0.55]; 0.79±0.05 | 0.15 [0.03, 0.26]; 0.32±0.07 |
| Validation | 0.60 [0.49, 0.70]; 0.90±0.02 | 0.16 [–0.02, 0.33]; 0.41±0.09 | 0.05 [–0.13, 0.23]; 0.24±0.10 |
| Replication | 0.49 [0.34, 0.62]; 0.82±0.07 | 0.32 [0.13, 0.49]; 0.56±0.1 | 0.13 [–0.07, 0.33]; 0.38±0.12 |
| Generalization | 0.42 [0.28, 0.55]; 0.91±0.02 | 0.22 [0.04, 0.39]; 0.69±0.07 | 0.12 [–0.07, 0.30]; 0.25±0.12 |
| PINES holdout | 0.04 [–0.08, 0.15]; 0.02±0.08 | 0.72 [0.66, 0.77]; 0.92±0.02 | 0.26 [0.16, 0.37]; 0.51±0.06 |
| VIDS validation | 0.03 [–0.13, 0.18]; 0.07±0.12 | 0.30 [0.15, 0.46]; 0.50±0.08 | 0.62 [0.54, 0.71]; 0.89±0.03 |

We applied the MJS, PINES, and VIDS to moral wrongness, general negative emotion holdout, and subjective disgust validation datasets and calculated the overall (bootstrapped 95% CI) as well as within subject (mean±SE) prediction−outcome correlations between the pattern expressions and the true ratings.

a indicates cross-validated.

# Supplementary References

Abraham, Alexandre, Fabian Pedregosa, Michael Eickenberg, Philippe Gervais, Andreas Mueller, Jean Kossaifi, Alexandre Gramfort, Bertrand Thirion, and Gael Varoquaux. 2014. “Machine Learning for Neuroimaging with Scikit-Learn.” *Frontiers in Neuroinformatics* 8.<https://doi.org/10.3389/fninf.2014.00014>.

Avants, B. B., C. L. Epstein, M. Grossman, and J. C. Gee. 2008. “Symmetric Diffeomorphic Image Registration with Cross-Correlation: Evaluating Automated Labeling of Elderly and Neurodegenerative Brain.” *Medical Image Analysis* 12 (1): 26–41.<https://doi.org/10.1016/j.media.2007.06.004>.

Behzadi, Yashar, Khaled Restom, Joy Liau, and Thomas T. Liu. 2007. “A Component Based Noise Correction Method (CompCor) for BOLD and Perfusion Based fMRI.” *NeuroImage* 37 (1): 90–101.<https://doi.org/10.1016/j.neuroimage.2007.04.042>.

Chang, L. J., Gianaros, P. J., Manuck, S. B., Krishnan, A., & Wager, T. D. (2015). A sensitive and specific neural signature for picture-induced negative affect. *PLoS biology*, *13*(6), e1002180.

Chakroff, A., Dungan, J., Koster-Hale, J., Brown, A., Saxe, R., Young, L. (2016). When minds matter for moral judgment: intent information is neurally encoded for harmful but not impure acts. Social Cognitive and Affective Neuroscience, 11(3), 476–84

Crone, D. L., Bode, S., Murawski, C., & Laham, S. M. (2018). The Socio-Moral Image Database (SMID): A novel stimulus set for the study of social, moral and affective processes. *PloS one*, *13*(1), e0190954.

Chapman, H. A., Kim, D. A., Susskind, J. M., & Anderson, A. K. (2009). In bad taste: Evidence for the oral origins of moral disgust. *Science*, *323*(5918), 1222-1226.

Ciric, R., William H. Thompson, R. Lorenz, M. Goncalves, E. MacNicol, C. J. Markiewicz, Y. O. Halchenko, et al. 2022. “TemplateFlow: FAIR-Sharing of Multi-Scale, Multi-Species Brain Models.” *Nature Methods* 19: 1568–71.<https://doi.org/10.1038/s41592-022-01681-2>.

Dale, Anders M., Bruce Fischl, and Martin I. Sereno. 1999. “Cortical Surface-Based Analysis: I. Segmentation and Surface Reconstruction.” *NeuroImage* 9 (2): 179–94.<https://doi.org/10.1006/nimg.1998.0395>.

Esteban, Oscar, Ross Blair, Christopher J. Markiewicz, Shoshana L. Berleant, Craig Moodie, Feilong Ma, Ayse Ilkay Isik, et al. 2018. “fMRIPrep 24.1.1.” *Software*.<https://doi.org/10.5281/zenodo.852659>.

Esteban, Oscar, Christopher Markiewicz, Ross W Blair, Craig Moodie, Ayse Ilkay Isik, Asier Erramuzpe Aliaga, James Kent, et al. 2019. “fMRIPrep: A Robust Preprocessing Pipeline for Functional MRI.” *Nature Methods* 16: 111–16.<https://doi.org/10.1038/s41592-018-0235-4>.

Fonov, VS, AC Evans, RC McKinstry, CR Almli, and DL Collins. 2009. “Unbiased Nonlinear Average Age-Appropriate Brain Templates from Birth to Adulthood.” *NeuroImage* 47, Supplement 1: S102.<https://doi.org/10.1016/S1053-8119(09)70884-5>.

Gan, X., Zhou, F., Xu, T., Liu, X., Zhang, R., Zheng, Z., ... & Becker, B. (2024). A neurofunctional signature of subjective disgust generalizes to oral distaste and socio-moral contexts. *Nature Human Behaviour*, *8*(7), 1383-1402.

Gorgolewski, K., C. D. Burns, C. Madison, D. Clark, Y. O. Halchenko, M. L. Waskom, and S. Ghosh. 2011. “Nipype: A Flexible, Lightweight and Extensible Neuroimaging Data Processing Framework in Python.” *Frontiers in Neuroinformatics* 5: 13.<https://doi.org/10.3389/fninf.2011.00013>.

Gorgolewski, Krzysztof J., Oscar Esteban, Christopher J. Markiewicz, Erik Ziegler, David Gage Ellis, Michael Philipp Notter, Dorota Jarecka, et al. 2018. “Nipype.” *Software*.<https://doi.org/10.5281/zenodo.596855>.

Graham, J., Nosek, B. A., Haidt, J., Iyer, R., Koleva, S., & Ditto, P. H. (2011). Mapping the moral domain. *Journal of Personality and Social Psychology*, *101*(2), 366.

Greve, Douglas N, and Bruce Fischl. 2009. “Accurate and Robust Brain Image Alignment Using Boundary-Based Registration.” *NeuroImage* 48 (1): 63–72.<https://doi.org/10.1016/j.neuroimage.2009.06.060>

Haufe, S., Meinecke, F., Görgen, K., Dähne, S., Haynes, J. D., Blankertz, B., & Bießmann, F. (2014). On the interpretation of weight vectors of linear models in multivariate neuroimaging. *Neuroimage*, *87*, 96-110.

Hopp, F. R., Jargow, B., Kouwen, E., & Bakker, B. N. (2024). The Dutch moral foundations stimulus database: A validation of moral foundations vignettes and sociomoral images. *Judgment and Decision Making*.

Jenkinson, Mark, Peter Bannister, Michael Brady, and Stephen Smith. 2002. “Improved Optimization for the Robust and Accurate Linear Registration and Motion Correction of Brain Images.” *NeuroImage* 17 (2): 825–41.<https://doi.org/10.1006/nimg.2002.1132>.

Klein, Arno, Satrajit S. Ghosh, Forrest S. Bao, Joachim Giard, Yrjö Häme, Eliezer Stavsky, Noah Lee, et al. 2017. “Mindboggling Morphometry of Human Brains.” *PLOS Computational Biology* 13 (2): e1005350.<https://doi.org/10.1371/journal.pcbi.1005350>.

Koster-Hale, J., Saxe, R., Dungan, J., Young, L.L. (2013). Decoding moral judgments from neural representations of intentions. Proceedings of the National Academy of Sciences, 110(14), 5648–53

Kragel, P. A., Reddan, M. C., LaBar, K. S., & Wager, T. D. (2019). Emotion schemas are embedded in the human visual system. *Science Advances*, *5*(7), eaaw4358.

Lancaster, J. L., Woldorff, M. G., Parsons, L. M., Liotti, M., Freitas, C. S., Rainey, L., ... & Fox, P. T. (2000). Automated Talairach atlas labels for functional brain mapping. *Human brain mapping*, *10*(3), 120-131.

Patriat, Rémi, Richard C. Reynolds, and Rasmus M. Birn. 2017. “An Improved Model of Motion-Related Signal Changes in fMRI.” *NeuroImage* 144, Part A (January): 74–82.<https://doi.org/10.1016/j.neuroimage.2016.08.051>.

Peirce, J. W. (2007). PsychoPy—psychophysics software in Python. *Journal of neuroscience methods*, *162*(1-2), 8-13.

Power, Jonathan D., Anish Mitra, Timothy O. Laumann, Abraham Z. Snyder, Bradley L. Schlaggar, and Steven E. Petersen. 2014. “Methods to Detect, Characterize, and Remove Motion Artifact in Resting State fMRI.” *NeuroImage* 84 (Supplement C): 320–41.<https://doi.org/10.1016/j.neuroimage.2013.08.048>.

Satterthwaite, Theodore D., Mark A. Elliott, Raphael T. Gerraty, Kosha Ruparel, James Loughead, Monica E. Calkins, Simon B. Eickhoff, et al. 2013. “An improved framework for confound regression and filtering for control of motion artifact in the preprocessing of resting-state functional connectivity data.” *NeuroImage* 64 (1): 240–56.<https://doi.org/10.1016/j.neuroimage.2012.08.052>.

Tsoi, L., Dungan, J. A., Chakroff, A., & Young, L. L. (2018). Neural substrates for moral judgments of psychological versus physical harm. *Social cognitive and affective neuroscience*, *13*(5), 460-470.

Tustison, N. J., B. B. Avants, P. A. Cook, Y. Zheng, A. Egan, P. A. Yushkevich, and J. C. Gee. 2010. “N4ITK: Improved N3 Bias Correction.” *IEEE Transactions on Medical Imaging* 29 (6): 1310–20.<https://doi.org/10.1109/TMI.2010.2046908>.

Wasserman, E.A., Chakroff, A., Saxe, R., Young, L. (2017). Illuminating the conceptual structure of the space of moral violations with searchlight representational similarity analysis. NeuroImage, 159, 371–87.

Xu, T., Zhang, L., Zhou, F., Fu, K., Gan, X., Chen, Z., ... & Becker, B. (2025). Distinct neural computations scale the violation of expected reward and emotion in social transgressions. *Communications Biology*, *8*(1), 106.

Zhang, Y., M. Brady, and S. Smith. 2001. “Segmentation of Brain MR Images Through a Hidden Markov Random Field Model and the Expectation-Maximization Algorithm.” *IEEE Transactions on Medical Imaging* 20 (1): 45–57.<https://doi.org/10.1109/42.906424>.
